# Supplementary material for: Sorbus domestica Leaf Extracts and Their Activity Markers: Antioxidant Potential and Synergy Effects in Scavenging Assays of Multiple Oxidants
Source: PubMed Central journal article supplement (PMC6630621; doi:10.3390/molecules24122289), 2019-06-20
Supplement: molecules-24-02289-s001.pdf [file molecules-24-02289-s001.pdf]

1 Article Supplementary Materials:

2 ***Sorbus domestica* leaf extracts and their activity**  
3 **markers: Antioxidant potential and synergy effects in**  
4 **scavenging assays of multiple oxidants**

5 Magdalena Rutkowska<sup>1\*</sup>, Monika Anna Olszewska<sup>1</sup>, Joanna Kolodziejczyk-Czepas<sup>2</sup>, Pawel  
6 Nowak<sup>2</sup>, Aleksandra Owczarek<sup>1</sup>

7 <sup>1</sup>Department of Pharmacognosy, Faculty of Pharmacy, Medical University of Lodz, ul. Muszynskiego 1, 90-  
8 151 Lodz, Poland; magdalena.rutkowska@umed.lodz.pl (M.R.); monika.olszewska@umed.lodz.pl (M.A.O.);  
9 aleksandra.owczarek@umed.lodz.pl (A.O.)

10 <sup>2</sup>Department of General Biochemistry, Faculty of Biology and Environmental Protection, University of Lodz,  
11 ul. Pomorska 141/143, 90-236 Lodz, Poland; joanna.kolodziejczyk@biol.uni.lodz.pl (J.K.-C.);  
12 pawel.nowak@biol.uni.lodz.pl (P.N.)

13 \* Correspondence: magdalena.rutkowska@umed.lodz.pl (M.R.)

14

15 **Supplementary Materials:**

- 16 • **Figure S1.**

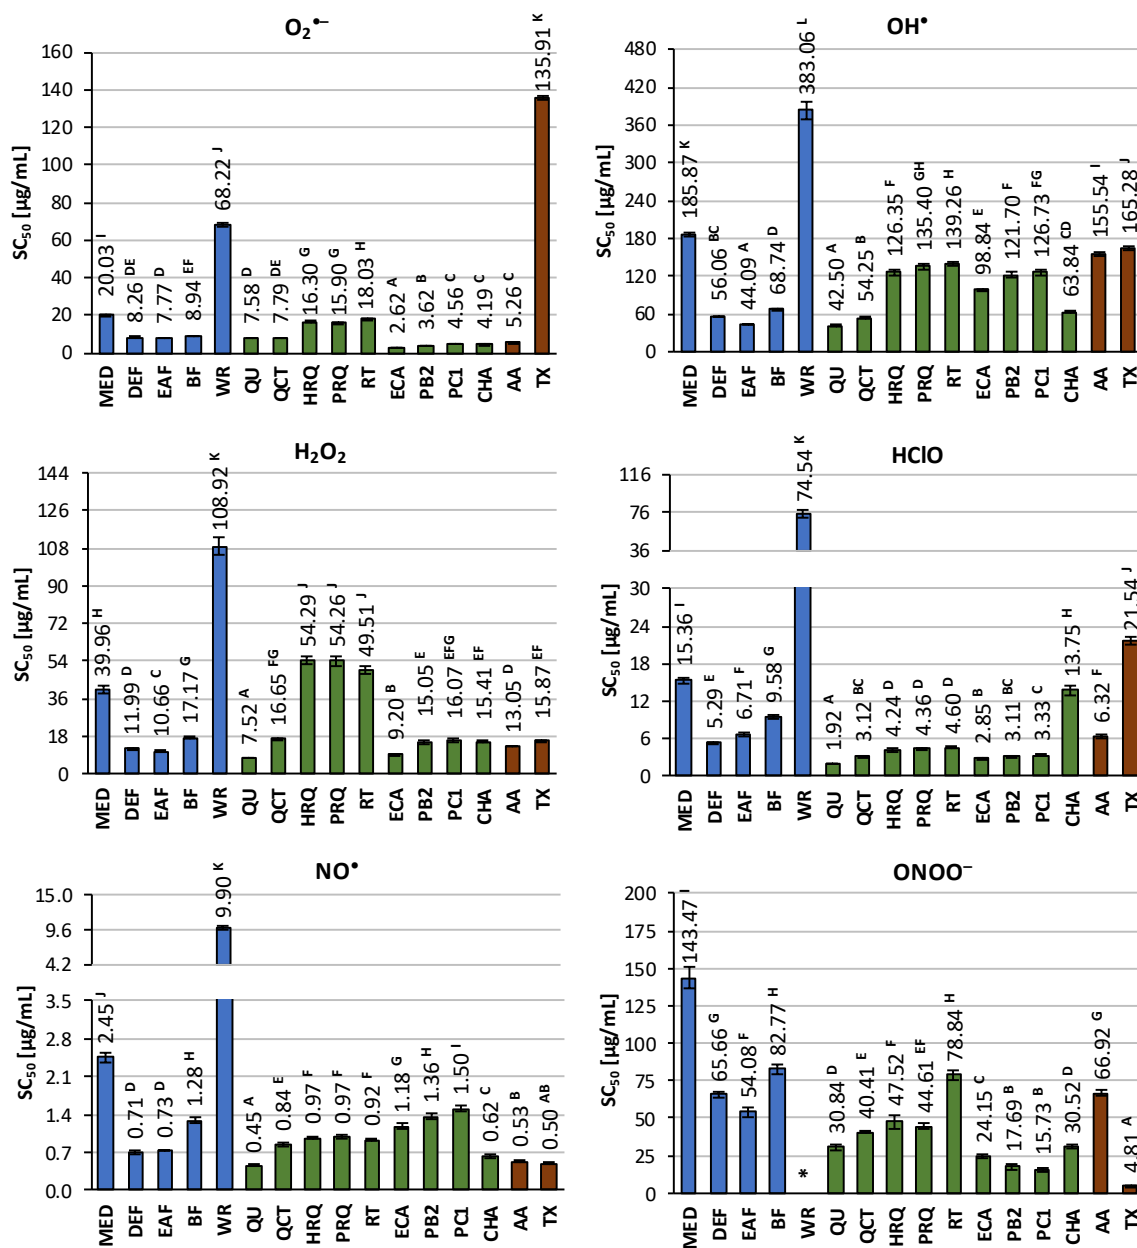

17

18

19

20

21

22

23

24

25

26

27

**Figure S1.** Antioxidant activity of *S. domestica* leaf extracts, their activity markers and standards towards *in vivo*-relevant oxidants. Results are presented as mean values of SC<sub>50</sub> (amount of antioxidant needed to decrease the oxidant level by 50%) ± SD (n = 3), expressed in µg of the dry extract or standard/mL. For each parameter different letters A-K indicate significant differences (p < 0.05). The analyte marked with an asterisk is inactive in concentration up to 200 µg/mL. MED, methanol-water (7:3, v/v) extract; DEF, diethyl ether fraction; EAF, ethyl acetate fraction; BF, n-butanol fraction; WR, water residue; QU, quercetin; QCT, quercitrin (quercetin 3-O-α-L-rhamnopyranoside); HRQ, quercetin 3-O-(2"-O-β-D-glucopyranosyl)-α-L-rhamnopyranoside; PRQ, quercetin 3-O-(2"-O-β-D-xylopyranosyl)-α-L-rhamnopyranoside; RT, rutin; ECA, (-)-epicatechin; PB2, procyanidin B2; PCL, procyanidin C1; CHA, chlorogenic acid (5-O-caffeoylquinic acid); AA, ascorbic acid; TX, Trolox.
